# Supplementary material for: Circadian genes Per1 and Per2 increase radiosensitivity of glioma in vivo
Source: PubMed Central journal article supplement (PMC4496409; doi:10.18632/oncotarget.3179), 2015-02-07
Supplement: oncotarget-06-9951-s001.pdf [file oncotarget-06-9951-s001.pdf]

## SUPPLEMENTARY FIGURE

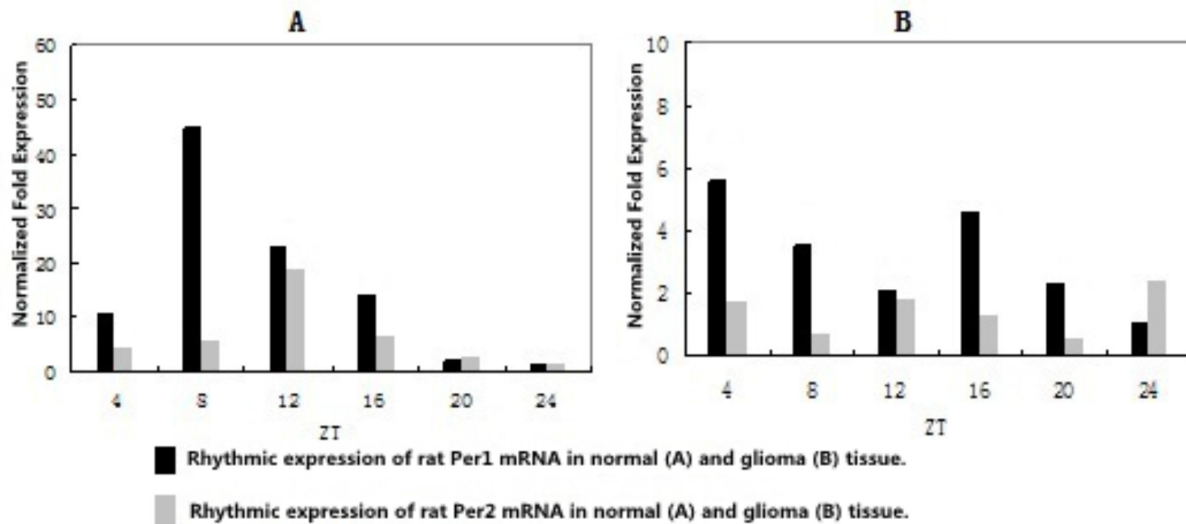

**Supplementary Figure S1: Rhythmic expression of rat *Per1* and *Per2* mRNA in normal (A) and glioma (B) tissue.** Total RNA was extracted from the SCN, and real-time RT-PCR was used to determine *Per1* and *Per2* mRNA levels. Relative expression of each mRNA was normalized to the corresponding level of  $\beta$ -actin mRNA. Data are the mean and standard deviation of three independent experiments.
